# Supplementary material
Source: PubMed Central journal article supplement (PMC5094324)
Supplement: 165.pdf [file 165.pdf]

**Supplementary Fig 1:** Form completed by Health Care Practitioner after analysis of AGP data.

**CDE South African Local Experience Project for Libre Pro**

**Patient report**

CDE Centre number..... Patient number (1-6).....

Type of Diabetes

 Type 1

 Type 2

 Other e.g. GDM, Pancreatic diabetes etc

Specify.....

HbA1c:.....

Reason for doing AGP:.....

Current therapy.....

Identifying potential problem: (rate 0= no problem to 5= major problem)

|                       |  |
|-----------------------|--|
| Glycaemic Exposure    |  |
| Glycaemic Variability |  |
| Instability           |  |
| Hypoglycaemia         |  |

Did the AGP aid in making a therapeutic decision/treatment change for this patient?

 Yes

 No

In future, do you think AGP will be useful *in this type of patient*?

 Yes

 No
